# Supplementary material for: Synthesis, structure, and reactivity of iridium perfluorocarbene complexes: regio- and stereo-specific addition of HCl across a metal carbon double bond
Source: Royal Society of Chemistry journal article supplement (doi:10.1039/c5dt02275d), 2015-01-01
Supplement: c5dt02275d1.pdf [file c5dt02275d1.pdf]

**SUPPORTING INFORMATION TO ACCOMPANY:**

**Synthesis, Structure, and Reactivity of Iridium Perfluorocarbene Complexes: Regio- and Stereo-specific Addition of HCl Across a Metal Carbon Double Bond.**

*Jian Yuan, Cheryl J. Bourgeois, Arnold L. Rheingold, Russell P. Hughes*

Department of Chemistry, 6128 Burke Laboratory, Dartmouth College, Hanover, New Hampshire 03755, and Department of Chemistry, University of California, San Diego, California 92093-0358

**DFT Calculation Details.**

All calculations were carried out using the hybrid B3LYP-D3 functional<sup>1</sup> with the zero-damping, two-body only D3 correction of Grimme et al.,<sup>2</sup> and the 6-311G\*\*++ basis,<sup>3</sup> as implemented in the Jaguar<sup>4</sup> suite of programs. Computed structures were confirmed as energy minima by calculating the vibrational frequencies using second derivative analytic methods, and confirming the absence of imaginary frequencies. Thermodynamic quantities were calculated assuming an ideal gas, and are zero point energy corrected.

**Material Relevant to all DFT output**

Jaguar version 7.9, release 23

Copyright Schrodinger, LLC

All Rights Reserved.

Use of this program should be acknowledged in publications as:

Jaguar, version 7.9, Schrodinger, LLC, New York, NY, 2011.

Non-default options chosen:

SCF calculation type: DFT(b3lyp-d3)

DFT=Becke\_3\_Parameter/HF+Slater+Becke88+VWN+LYP (B3LYP)

Vibrational frequencies and related properties will be computed from analytic second derivatives

Molecular symmetry not used

Energy convergence criterion: 1.00E-05 hartrees

RMS density matrix convergence criterion: 1.00E-06

Highest accuracy cutoffs used in SCF

Coordinates.

Compound 17

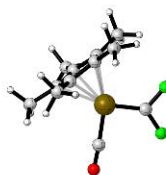

31

Ir\_CPSTAR\_CO\_CF2\_D3

|    |          |          |          |
|----|----------|----------|----------|
| C  | -0.10870 | 0.55180  | -0.00500 |
| Ir | -1.97350 | 0.78080  | 0.04560  |
| F  | 0.78740  | 1.55740  | -0.05350 |
| F  | 0.62280  | -0.56380 | 0.00230  |
| C  | -4.12840 | 1.59570  | -0.13810 |
| C  | -3.34230 | 2.19800  | -1.17650 |
| C  | -2.30470 | 2.96490  | -0.53950 |
| C  | -2.48610 | 2.87150  | 0.88870  |
| C  | -3.61220 | 2.02630  | 1.13900  |
| O  | -2.47300 | -2.18910 | 0.17940  |
| C  | -2.24340 | -1.06020 | 0.12990  |
| C  | -1.29980 | 3.83320  | -1.23650 |
| H  | -0.36310 | 3.87940  | -0.68120 |
| H  | -1.07260 | 3.45260  | -2.23290 |
| H  | -1.68380 | 4.85360  | -1.34310 |
| C  | -3.61910 | 2.13890  | -2.64770 |
| H  | -2.69820 | 2.19570  | -3.22870 |
| H  | -4.12570 | 1.21270  | -2.92090 |
| H  | -4.26100 | 2.97440  | -2.95160 |
| C  | -1.68430 | 3.60670  | 1.91930  |
| H  | -1.67220 | 3.07080  | 2.86900  |
| H  | -0.65060 | 3.73830  | 1.59780  |
| H  | -2.11020 | 4.60060  | 2.09730  |
| C  | -5.36540 | 0.77090  | -0.34260 |
| H  | -5.51070 | 0.05890  | 0.47090  |
| H  | -6.25050 | 1.41500  | -0.38520 |
| H  | -5.31830 | 0.20480  | -1.27350 |
| C  | -4.21970 | 1.73670  | 2.47810  |
| H  | -3.46190 | 1.71520  | 3.26220  |
| H  | -4.95600 | 2.50500  | 2.74160  |
| H  | -4.72920 | 0.77250  | 2.48480  |

Compound 18

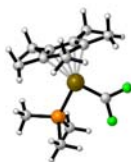

41

Ir\_CPSTAR\_PMe3\_CF2\_D3

|    |          |          |          |
|----|----------|----------|----------|
| C  | -0.62310 | 2.05340  | -0.64530 |
| C  | 0.30950  | 1.92860  | 0.42740  |
| C  | -1.85500 | 1.40930  | -0.24560 |
| Ir | -0.16480 | -0.21610 | -0.27570 |

|   |          |          |          |
|---|----------|----------|----------|
| F | 1.26540  | -2.78700 | -0.20640 |
| C | 0.85670  | -1.62230 | 0.38440  |
| C | -0.32900 | 1.18390  | 1.48680  |
| C | -1.68050 | 0.88990  | 1.07130  |
| P | -0.33700 | -1.27840 | -2.27710 |
| F | 1.38790  | -1.70880 | 1.63120  |
| C | -1.30460 | -0.39640 | -3.57200 |
| H | -1.32280 | -0.98200 | -4.49460 |
| H | -2.32650 | -0.24330 | -3.22490 |
| H | -0.84930 | 0.57370  | -3.77260 |
| C | 1.23720  | -1.63020 | -3.17020 |
| H | 1.05260  | -2.15140 | -4.11390 |
| H | 1.74990  | -0.68690 | -3.36480 |
| H | 1.87090  | -2.24260 | -2.52930 |
| C | -1.15090 | -2.93310 | -2.27410 |
| H | -1.17940 | -3.36570 | -3.27830 |
| H | -0.59750 | -3.59170 | -1.60510 |
| H | -2.16680 | -2.82530 | -1.89080 |
| C | -2.74080 | 0.25720  | 1.92020  |
| H | -2.31230 | -0.46280 | 2.61840  |
| H | -3.27250 | 1.01720  | 2.50660  |
| H | -3.47600 | -0.27000 | 1.31060  |
| C | 0.24110  | 0.93640  | 2.85220  |
| H | -0.16960 | 0.02780  | 3.29340  |
| H | 1.32340  | 0.81300  | 2.81280  |
| H | 0.01580  | 1.77350  | 3.52290  |
| C | -3.15320 | 1.44350  | -0.99640 |
| H | -3.71680 | 0.51730  | -0.86720 |
| H | -3.78230 | 2.26710  | -0.63850 |
| C | -0.41370 | 2.86810  | -1.88700 |
| H | -1.07910 | 2.55560  | -2.69250 |
| H | -0.61570 | 3.92840  | -1.69300 |
| H | 0.61250  | 2.78750  | -2.25020 |
| C | 1.67110  | 2.55090  | 0.49290  |
| H | 2.34680  | 1.96010  | 1.11240  |
| H | 2.11810  | 2.63380  | -0.49870 |
| H | 1.61550  | 3.55840  | 0.92340  |

Compound 12a

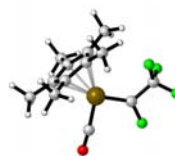

34

Ir\_CPSTAR\_CO\_CFCF3\_SYN\_D3

|    |          |          |          |
|----|----------|----------|----------|
| C  | -0.12550 | 0.44190  | -0.03170 |
| Ir | -1.97140 | 0.80950  | 0.04410  |
| C  | 1.03210  | 1.43500  | -0.08940 |
| F  | 2.16050  | 0.96170  | 0.47020  |
| F  | 1.33120  | 1.76950  | -1.37300 |
| F  | 0.72740  | 2.58910  | 0.54840  |
| F  | 0.43420  | -0.79740 | -0.13200 |
| C  | -4.13980 | 1.60350  | -0.13690 |
| C  | -3.34130 | 2.19050  | -1.17150 |
| C  | -2.32890 | 3.00470  | -0.53610 |

|   |          |          |          |
|---|----------|----------|----------|
| C | -2.51580 | 2.91340  | 0.88410  |
| C | -3.62290 | 2.03130  | 1.13330  |
| O | -2.67280 | -2.12000 | 0.09660  |
| C | -2.34910 | -1.01640 | 0.08120  |
| C | -1.39760 | 3.92670  | -1.26470 |
| H | -0.55620 | 4.22350  | -0.64280 |
| H | -0.99520 | 3.45720  | -2.16310 |
| H | -1.93400 | 4.83240  | -1.56810 |
| C | -3.59310 | 2.11120  | -2.64580 |
| H | -2.66140 | 2.16930  | -3.20920 |
| H | -4.08820 | 1.17830  | -2.91650 |
| H | -4.23510 | 2.93930  | -2.96890 |
| C | -1.79030 | 3.68990  | 1.93940  |
| H | -1.58300 | 3.07210  | 2.81420  |
| H | -0.84280 | 4.07890  | 1.57430  |
| H | -2.40540 | 4.53650  | 2.26440  |
| C | -5.35370 | 0.74680  | -0.34510 |
| H | -5.49390 | 0.04340  | 0.47660  |
| H | -6.25160 | 1.37040  | -0.40850 |
| H | -5.28230 | 0.16910  | -1.26730 |
| C | -4.21350 | 1.73950  | 2.47910  |
| H | -3.44200 | 1.69640  | 3.24860  |
| H | -4.92830 | 2.52110  | 2.76200  |
| H | -4.74290 | 0.78620  | 2.48550  |

#### Compound 12b

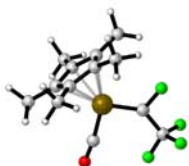

34

| Ir_CPSTAR_CO_CFCF3_ANTI_D3_REDONE |          |          |          |
|-----------------------------------|----------|----------|----------|
| C                                 | -0.18310 | 0.50410  | 0.19270  |
| Ir                                | -2.04040 | 0.73570  | 0.01660  |
| C                                 | 0.76310  | -0.68380 | 0.19570  |
| F                                 | 1.66730  | -0.58880 | -0.81030 |
| F                                 | 1.46790  | -0.74490 | 1.35200  |
| F                                 | 0.12610  | -1.85690 | 0.05230  |
| F                                 | 0.63630  | 1.60050  | 0.35800  |
| C                                 | -4.18280 | 1.59860  | -0.15470 |
| C                                 | -3.37450 | 2.16120  | -1.20120 |
| C                                 | -2.31540 | 2.91730  | -0.57700 |
| C                                 | -2.47170 | 2.81280  | 0.84650  |
| C                                 | -3.62860 | 1.99180  | 1.11150  |
| O                                 | -2.80800 | -2.16610 | -0.27370 |
| C                                 | -2.42890 | -1.08650 | -0.15540 |
| C                                 | -1.27470 | 3.73060  | -1.28490 |
| H                                 | -0.33280 | 3.72340  | -0.73640 |
| H                                 | -1.07910 | 3.33870  | -2.28330 |
| H                                 | -1.60550 | 4.76980  | -1.38620 |
| C                                 | -3.64790 | 2.08760  | -2.67210 |
| H                                 | -2.72200 | 2.10520  | -3.24780 |
| H                                 | -4.18140 | 1.17290  | -2.93210 |
| H                                 | -4.26150 | 2.93750  | -2.99180 |
| C                                 | -1.62020 | 3.49740  | 1.87210  |
| H                                 | -1.63480 | 2.95900  | 2.82010  |

|   |          |         |          |
|---|----------|---------|----------|
| H | -0.58310 | 3.55780 | 1.54190  |
| H | -1.98300 | 4.51490 | 2.05290  |
| C | -5.43260 | 0.79230 | -0.35140 |
| H | -5.58850 | 0.09110 | 0.46930  |
| H | -6.30710 | 1.44920 | -0.40250 |
| H | -5.39350 | 0.21490 | -1.27580 |
| C | -4.21130 | 1.71120 | 2.46250  |
| H | -3.43170 | 1.63170 | 3.22070  |
| H | -4.89330 | 2.51560 | 2.76110  |
| H | -4.77320 | 0.77680 | 2.46710  |

#### Compound 13a

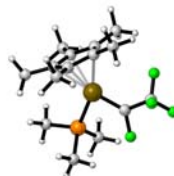

44

| Ir_CPSTAR_PMe3_CFCF3_TRANS_D3 |          |          |          |
|-------------------------------|----------|----------|----------|
| C                             | -0.62840 | 2.06620  | -0.59470 |
| C                             | 0.26390  | 1.93470  | 0.52480  |
| C                             | -1.84730 | 1.38100  | -0.26620 |
| Ir                            | -0.10080 | -0.18850 | -0.29900 |
| F                             | 1.40560  | -2.69540 | -0.51610 |
| C                             | 1.16580  | -1.48940 | 0.15490  |
| C                             | -0.39060 | 1.14440  | 1.52850  |
| C                             | -1.69890 | 0.78910  | 1.02360  |
| P                             | -0.48490 | -1.31230 | -2.24840 |
| C                             | 2.11500  | -1.51430 | 1.34210  |
| F                             | 3.25080  | -2.20870 | 1.11330  |
| F                             | 2.49540  | -0.26400 | 1.70190  |
| F                             | 1.54050  | -2.07160 | 2.44860  |
| C                             | -1.63410 | -0.50400 | -3.43790 |
| H                             | -1.67500 | -1.08470 | -4.36270 |
| H                             | -2.63460 | -0.44440 | -3.01270 |
| H                             | -1.28310 | 0.50330  | -3.66300 |
| C                             | 0.98610  | -1.59180 | -3.32060 |
| H                             | 0.71350  | -2.15370 | -4.21820 |
| H                             | 1.39670  | -0.62220 | -3.60670 |
| H                             | 1.73980  | -2.13850 | -2.75690 |
| C                             | -1.22630 | -2.99200 | -2.10720 |
| H                             | -1.36320 | -3.44890 | -3.09130 |
| H                             | -0.56860 | -3.61130 | -1.49860 |
| H                             | -2.19110 | -2.90810 | -1.60420 |
| C                             | -2.76700 | 0.08840  | 1.80660  |
| H                             | -2.33830 | -0.65650 | 2.47830  |
| H                             | -3.33190 | 0.80530  | 2.41590  |
| H                             | -3.47300 | -0.42190 | 1.14940  |
| C                             | 0.05570  | 0.91950  | 2.94300  |
| H                             | -0.13100 | -0.10670 | 3.26360  |
| H                             | 1.11870  | 1.11220  | 3.06750  |
| H                             | -0.49320 | 1.58980  | 3.61400  |
| C                             | -3.12970 | 1.42010  | -1.04280 |
| H                             | -3.65450 | 0.46300  | -1.00950 |
| H                             | -3.79900 | 2.17540  | -0.61590 |
| C                             | -0.38140 | 2.92780  | -1.79660 |
| H                             | -0.99730 | 2.62400  | -2.64450 |
| H                             | -0.61650 | 3.97680  | -1.58000 |

|   |         |         |          |
|---|---------|---------|----------|
| H | 0.66250 | 2.87940 | -2.11060 |
| C | 1.59020 | 2.61860 | 0.65680  |
| H | 2.23820 | 2.09730 | 1.35860  |
| H | 2.10800 | 2.66330 | -0.30240 |
| H | 1.45250 | 3.64610 | 1.01410  |

Compound 13b

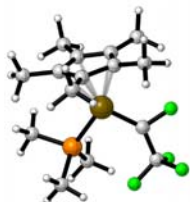

44

|                             |          |          |          |
|-----------------------------|----------|----------|----------|
| Ir_CPSTAR_PMe3_CFCF3_CIS_D3 |          |          |          |
| C                           | 7.38980  | 2.26190  | -0.29310 |
| C                           | 8.24260  | 2.03900  | 0.84710  |
| C                           | 6.13360  | 1.61660  | -0.03010 |
| Ir                          | 7.85300  | -0.01290 | -0.04000 |
| C                           | 9.25110  | -1.11870 | 0.52990  |
| C                           | 7.51780  | 1.24150  | 1.79590  |
| F                           | 10.04550 | -0.68570 | 1.60220  |
| C                           | 6.21160  | 0.96570  | 1.23910  |
| P                           | 7.42530  | -1.11930 | -2.00620 |
| C                           | 9.87590  | -2.44870 | 0.16860  |
| F                           | 11.03810 | -2.30470 | -0.53540 |
| F                           | 10.17870 | -3.19190 | 1.25610  |
| F                           | 9.06590  | -3.21590 | -0.60280 |
| C                           | 6.41440  | -0.13670 | -3.19770 |
| H                           | 6.34260  | -0.67320 | -4.14730 |
| H                           | 5.41140  | 0.01610  | -2.80460 |
| H                           | 6.88300  | 0.83260  | -3.36850 |
| C                           | 6.43210  | -2.67390 | -1.96820 |
| H                           | 6.29000  | -3.07110 | -2.97740 |
| H                           | 6.92090  | -3.41840 | -1.34510 |
| H                           | 5.45920  | -2.44100 | -1.53060 |
| C                           | 5.08470  | 0.28300  | 1.95180  |
| H                           | 5.45320  | -0.50200 | 2.61300  |
| H                           | 4.52100  | 0.99960  | 2.56230  |
| H                           | 4.38920  | -0.17630 | 1.24800  |
| C                           | 7.96350  | 0.87880  | 3.18010  |
| H                           | 7.54930  | -0.08250 | 3.48680  |
| H                           | 9.04740  | 0.80030  | 3.23880  |
| H                           | 7.62900  | 1.63730  | 3.89700  |
| C                           | 9.61450  | 2.60550  | 1.04950  |
| H                           | 10.23620 | 1.91740  | 1.62280  |
| H                           | 10.11150 | 2.78560  | 0.09540  |
| H                           | 9.56430  | 3.55720  | 1.59100  |
| C                           | 7.71070  | 3.15860  | -1.45060 |
| H                           | 7.10070  | 2.92330  | -2.32380 |
| H                           | 7.52510  | 4.20850  | -1.19420 |
| H                           | 8.75800  | 3.06770  | -1.74290 |
| C                           | 4.87550  | 1.75380  | -0.83370 |
| H                           | 4.30890  | 0.82090  | -0.86620 |
| H                           | 4.22790  | 2.51160  | -0.37850 |
| H                           | 5.07430  | 2.06840  | -1.85730 |
| C                           | 8.85320  | -1.51720 | -3.10460 |
| H                           | 8.50470  | -2.00820 | -4.01740 |

|   |         |          |          |
|---|---------|----------|----------|
| H | 9.34510 | -0.57770 | -3.36320 |
| H | 9.57600 | -2.15550 | -2.60520 |

Compound 14a

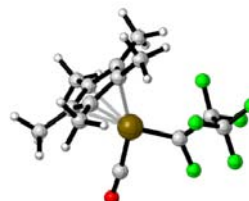

37

|                                |          |          |          |
|--------------------------------|----------|----------|----------|
| Ir_CPSTAR_CO_CFCF2CF3_TRANS_D3 |          |          |          |
| C                              | -0.05260 | 0.42610  | -0.09280 |
| Ir                             | -1.88860 | 0.84050  | -0.19490 |
| C                              | 1.11480  | 1.33580  | 0.25890  |
| F                              | 2.22190  | 1.05880  | -0.48520 |
| F                              | 0.79070  | 2.64220  | 0.02980  |
| F                              | 0.48540  | -0.81960 | -0.25740 |
| C                              | -4.06910 | 1.58560  | -0.03580 |
| C                              | -3.45950 | 2.23300  | -1.16440 |
| C                              | -2.39220 | 3.06220  | -0.67110 |
| C                              | -2.33350 | 2.91280  | 0.75340  |
| C                              | -3.36830 | 1.98590  | 1.14810  |
| O                              | -2.59200 | -2.01350 | -0.84790 |
| C                              | -2.26610 | -0.93920 | -0.59940 |
| C                              | -1.58410 | 4.00890  | -1.50410 |
| H                              | -0.66670 | 4.30290  | -0.99860 |
| H                              | -1.30900 | 3.56010  | -2.45940 |
| H                              | -2.16640 | 4.91350  | -1.71240 |
| C                              | -3.92980 | 2.17840  | -2.58570 |
| H                              | -3.09540 | 2.27500  | -3.28130 |
| H                              | -4.43650 | 1.23770  | -2.80340 |
| H                              | -4.63390 | 2.99370  | -2.78810 |
| C                              | -1.53070 | 3.74580  | 1.70490  |
| H                              | -1.27530 | 3.19130  | 2.60590  |
| H                              | -0.60430 | 4.09810  | 1.25740  |
| H                              | -2.11830 | 4.62140  | 2.00270  |
| C                              | -5.27520 | 0.69440  | -0.07940 |
| H                              | -5.25410 | -0.04550 | 0.72160  |
| H                              | -6.18880 | 1.28700  | 0.03510  |
| H                              | -5.34320 | 0.15630  | -1.02560 |
| C                              | -3.72730 | 1.63960  | 2.56040  |
| H                              | -2.83870 | 1.58190  | 3.18990  |
| H                              | -4.39280 | 2.40070  | 2.98430  |
| H                              | -4.23840 | 0.67830  | 2.61770  |
| C                              | 1.53020  | 1.24130  | 1.75620  |
| F                              | 2.52650  | 2.09720  | 2.03250  |
| F                              | 0.48170  | 1.55440  | 2.54100  |
| F                              | 1.93330  | 0.00400  | 2.06280  |

Compound 14b

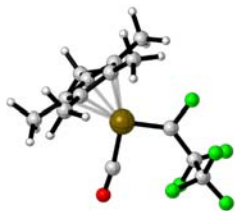

37

| Ir_CPSTAR_CO_CFCF2CF3_CIS_D3 |          |          |          |
|------------------------------|----------|----------|----------|
| C                            | -0.11430 | 0.53280  | 0.02360  |
| Ir                           | -1.98180 | 0.74040  | -0.05250 |
| C                            | 0.80560  | -0.67120 | 0.14550  |
| F                            | 0.23980  | -1.78190 | -0.39380 |
| F                            | 1.99300  | -0.46010 | -0.49500 |
| F                            | 0.69540  | 1.64150  | 0.13110  |
| C                            | -4.13580 | 1.58360  | -0.09600 |
| C                            | -3.39680 | 2.16830  | -1.17770 |
| C                            | -2.30690 | 2.92340  | -0.60690 |
| C                            | -2.37920 | 2.80290  | 0.82160  |
| C                            | -3.50920 | 1.96350  | 1.14310  |
| O                            | -2.71320 | -2.18220 | -0.20700 |
| C                            | -2.35030 | -1.09200 | -0.15380 |
| C                            | -1.31780 | 3.75690  | -1.36220 |
| H                            | -0.34740 | 3.75750  | -0.86650 |
| H                            | -1.17230 | 3.37700  | -2.37300 |
| H                            | -1.66700 | 4.79230  | -1.43490 |
| C                            | -3.74970 | 2.11210  | -2.63090 |
| H                            | -2.85710 | 2.14280  | -3.25540 |
| H                            | -4.29120 | 1.19760  | -2.87300 |
| H                            | -4.38440 | 2.96190  | -2.90570 |
| C                            | -1.47000 | 3.47780  | 1.80360  |
| H                            | -1.42400 | 2.92560  | 2.74290  |
| H                            | -0.45520 | 3.54890  | 1.41200  |
| H                            | -1.82630 | 4.49060  | 2.02110  |
| C                            | -5.38390 | 0.76150  | -0.22550 |
| H                            | -5.47400 | 0.04360  | 0.59120  |
| H                            | -6.27030 | 1.40390  | -0.20680 |
| H                            | -5.39610 | 0.20040  | -1.16040 |
| C                            | -3.99780 | 1.65580  | 2.52620  |
| H                            | -3.16750 | 1.57170  | 3.22870  |
| H                            | -4.66580 | 2.44820  | 2.88340  |
| H                            | -4.54890 | 0.71490  | 2.55300  |
| C                            | 1.14590  | -1.01900 | 1.62760  |
| F                            | 2.05180  | -2.00380 | 1.69420  |
| F                            | 1.64100  | 0.05560  | 2.26160  |
| F                            | 0.04100  | -1.41930 | 2.27670  |

Compound 15a

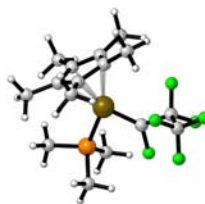

48

| Ir_CPSTAR_PMe3_CFCF2CF3_TRANS_D3 |          |          |          |
|----------------------------------|----------|----------|----------|
| C                                | -0.64230 | 2.09910  | -0.65270 |
| C                                | 0.27560  | 2.02440  | 0.44990  |
| C                                | -1.84600 | 1.41310  | -0.26670 |
| Ir                               | -0.07680 | -0.12320 | -0.27960 |
| F                                | 1.45620  | -2.60660 | -0.55990 |
| C                                | 1.15950  | -1.45160 | 0.18440  |
| C                                | -0.35720 | 1.29440  | 1.51200  |
| C                                | -1.66290 | 0.89140  | 1.04930  |
| P                                | -0.42670 | -1.23500 | -2.24580 |
| C                                | 2.01070  | -1.61030 | 1.42970  |
| F                                | 3.24260  | -2.14410 | 1.15930  |
| F                                | 2.22860  | -0.40570 | 2.03330  |
| C                                | -1.60410 | -0.45550 | -3.42600 |
| H                                | -1.63620 | -1.04080 | -4.34820 |
| H                                | -2.60270 | -0.42210 | -2.99330 |
| H                                | -1.28180 | 0.55920  | -3.65920 |
| C                                | 1.04940  | -1.45310 | -3.32470 |
| H                                | 0.79310  | -2.01750 | -4.22570 |
| H                                | 1.42170  | -0.46640 | -3.60530 |
| H                                | 1.82530  | -1.97550 | -2.76880 |
| C                                | -1.12630 | -2.93310 | -2.11920 |
| H                                | -1.25010 | -3.38090 | -3.10920 |
| H                                | -0.46040 | -3.54690 | -1.51560 |
| H                                | -2.09520 | -2.87300 | -1.62060 |
| C                                | -2.69770 | 0.20350  | 1.88500  |
| H                                | -2.23810 | -0.51820 | 2.56100  |
| H                                | -3.24850 | 0.93230  | 2.49270  |
| H                                | -3.41980 | -0.33050 | 1.26590  |
| C                                | 0.08420  | 1.23780  | 2.94320  |
| H                                | -0.11970 | 0.26900  | 3.39580  |
| H                                | 1.14750  | 1.43880  | 3.05050  |
| H                                | -0.46220 | 1.99780  | 3.51420  |
| C                                | -3.14720 | 1.39790  | -1.01170 |
| H                                | -3.63890 | 0.42480  | -0.95140 |
| H                                | -3.83060 | 2.13730  | -0.57920 |
| H                                | -3.02010 | 1.65060  | -2.06350 |
| C                                | -0.42970 | 2.90990  | -1.89580 |
| H                                | -1.08410 | 2.58770  | -2.70650 |
| H                                | -0.64010 | 3.96960  | -1.70870 |
| H                                | 0.60020  | 2.83290  | -2.24840 |
| C                                | 1.61270  | 2.69570  | 0.52460  |
| H                                | 2.28920  | 2.14670  | 1.17910  |
| H                                | 2.07870  | 2.75680  | -0.45960 |
| H                                | 1.50950  | 3.71570  | 0.91360  |
| C                                | 1.36750  | -2.53330 | 2.50670  |
| F                                | 2.14910  | -2.63120 | 3.59620  |
| F                                | 0.17680  | -2.04300 | 2.90380  |
| F                                | 1.16690  | -3.76580 | 2.02000  |

Compound 15b

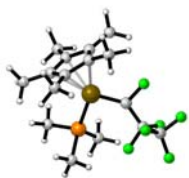

48

| Ir_CPSTAR_PMe3_CFCF2CF3_CIS_D3 |          |          |          |
|--------------------------------|----------|----------|----------|
| C                              | 7.36130  | 2.28380  | -0.28920 |
| C                              | 8.23320  | 2.06360  | 0.83900  |
| C                              | 6.13270  | 1.58980  | -0.03060 |
| Ir                             | 7.89140  | 0.01470  | -0.08140 |
| C                              | 9.31840  | -1.06280 | 0.46810  |
| C                              | 7.54360  | 1.22560  | 1.77840  |
| F                              | 10.13340 | -0.59070 | 1.51870  |
| C                              | 6.24460  | 0.91230  | 1.22490  |
| P                              | 7.44050  | -1.11470 | -2.02960 |
| C                              | 9.86440  | -2.44770 | 0.23130  |
| F                              | 11.11200 | -2.43240 | -0.35590 |
| F                              | 9.05930  | -3.16640 | -0.60770 |
| C                              | 6.43580  | -0.13440 | -3.22820 |
| H                              | 6.36330  | -0.67430 | -4.17580 |
| H                              | 5.43240  | 0.02420  | -2.83820 |
| H                              | 6.90900  | 0.83240  | -3.40060 |
| C                              | 6.43130  | -2.65800 | -1.96720 |
| H                              | 6.26600  | -3.05670 | -2.97220 |
| H                              | 6.92270  | -3.40670 | -1.35120 |
| H                              | 5.46930  | -2.41290 | -1.51250 |
| C                              | 5.14970  | 0.17160  | 1.92990  |
| H                              | 5.55350  | -0.61190 | 2.57190  |
| H                              | 4.56160  | 0.85240  | 2.55800  |
| H                              | 4.46910  | -0.30090 | 1.22020  |
| C                              | 8.01560  | 0.84110  | 3.14790  |
| H                              | 7.64330  | -0.14530 | 3.42800  |
| H                              | 9.10210  | 0.80470  | 3.19660  |
| H                              | 7.65660  | 1.56390  | 3.88900  |
| C                              | 9.58760  | 2.67060  | 1.04060  |
| H                              | 10.23310 | 1.99670  | 1.60400  |
| H                              | 10.07380 | 2.87490  | 0.08590  |
| H                              | 9.50970  | 3.61510  | 1.59130  |
| C                              | 7.64100  | 3.21240  | -1.43150 |
| H                              | 7.03720  | 2.96630  | -2.30620 |
| H                              | 7.41430  | 4.24950  | -1.15660 |
| H                              | 8.68980  | 3.16860  | -1.72920 |
| C                              | 4.86310  | 1.69420  | -0.82060 |
| H                              | 4.33360  | 0.74030  | -0.86710 |
| H                              | 4.19030  | 2.41590  | -0.34400 |
| H                              | 5.04030  | 2.03720  | -1.83920 |
| C                              | 8.86450  | -1.53750 | -3.12200 |
| H                              | 8.51580  | -2.05290 | -4.02130 |
| H                              | 9.35340  | -0.60370 | -3.40540 |
| H                              | 9.58800  | -2.16060 | -2.60430 |
| C                              | 9.99900  | -3.31850 | 1.52730  |
| F                              | 10.13780 | -4.61680 | 1.19690  |
| F                              | 11.05540 | -2.97320 | 2.26840  |
| F                              | 8.88870  | -3.20140 | 2.27830  |

Compound 16a

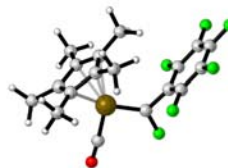

41

| Ir_CPSTAR_CO_CFC6F5_TRANS_D3 |          |          |          |
|------------------------------|----------|----------|----------|
| C                            | -0.09180 | 0.51990  | -0.00790 |
| Ir                           | -1.94470 | 0.80140  | 0.04980  |
| F                            | 0.55560  | -0.68530 | -0.00920 |
| C                            | -4.11610 | 1.62380  | -0.12770 |
| C                            | -3.31580 | 2.21440  | -1.15920 |
| C                            | -2.29110 | 3.00370  | -0.51780 |
| C                            | -2.46950 | 2.89600  | 0.90370  |
| C                            | -3.59110 | 2.03300  | 1.14730  |
| O                            | -2.53310 | -2.14990 | 0.15670  |
| C                            | -2.26360 | -1.03130 | 0.11850  |
| C                            | -1.33970 | 3.92020  | -1.22540 |
| H                            | -0.47890 | 4.16610  | -0.60390 |
| H                            | -0.97150 | 3.47680  | -2.15140 |
| H                            | -1.84160 | 4.85930  | -1.48120 |
| C                            | -3.56380 | 2.14930  | -2.63520 |
| H                            | -2.62800 | 2.19000  | -3.19400 |
| H                            | -4.07480 | 1.22700  | -2.91250 |
| H                            | -4.18800 | 2.99070  | -2.95840 |
| C                            | -1.70020 | 3.63900  | 1.95250  |
| H                            | -1.56560 | 3.03620  | 2.85050  |
| H                            | -0.71180 | 3.92870  | 1.59650  |
| H                            | -2.23130 | 4.55530  | 2.23290  |
| C                            | -5.33820 | 0.78010  | -0.33990 |
| H                            | -5.47800 | 0.06730  | 0.47380  |
| H                            | -6.23310 | 1.40940  | -0.39060 |
| H                            | -5.27460 | 0.21310  | -1.26940 |
| C                            | -4.17880 | 1.72930  | 2.49180  |
| H                            | -3.40480 | 1.67440  | 3.25820  |
| H                            | -4.89060 | 2.50920  | 2.78620  |
| H                            | -4.71020 | 0.77700  | 2.48950  |
| C                            | 2.71800  | 3.76870  | -0.17740 |
| C                            | 2.27810  | 3.29200  | 1.05310  |
| C                            | 1.39790  | 2.21790  | 1.09650  |
| C                            | 0.92900  | 1.60630  | -0.06480 |
| C                            | 1.39080  | 2.10120  | -1.28250 |
| C                            | 2.27270  | 3.17180  | -1.35150 |
| F                            | 3.55750  | 4.80510  | -0.23100 |
| F                            | 2.69830  | 3.87430  | 2.18170  |
| F                            | 0.97910  | 1.79250  | 2.29530  |
| F                            | 0.94310  | 1.57750  | -2.43150 |
| F                            | 2.67200  | 3.65040  | -2.53500 |

Compound 16b

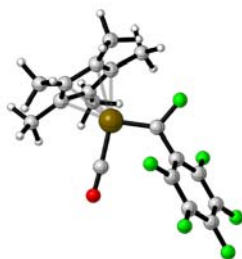

41  
Ir\_CPSTAR\_CO\_CFC6F5\_CIS\_D3

|    |          |          |          |
|----|----------|----------|----------|
| C  | -0.15800 | 0.46880  | 0.09390  |
| Ir | -2.01490 | 0.75900  | 0.11850  |
| F  | 0.72090  | 1.52990  | 0.00050  |
| C  | -4.16020 | 1.62900  | -0.11410 |
| C  | -3.34110 | 2.11410  | -1.18720 |
| C  | -2.27530 | 2.89550  | -0.60500 |
| C  | -2.45140 | 2.89540  | 0.82200  |
| C  | -3.61240 | 2.10350  | 1.12860  |
| O  | -2.60270 | -2.18890 | 0.37870  |
| C  | -2.34680 | -1.06870 | 0.28060  |
| C  | -1.23620 | 3.66410  | -1.36480 |
| H  | -0.30570 | 3.73160  | -0.80190 |
| H  | -1.00820 | 3.18180  | -2.31580 |
| H  | -1.58820 | 4.68000  | -1.57410 |
| C  | -3.60460 | 1.94950  | -2.65270 |
| H  | -2.67510 | 1.92880  | -3.22230 |
| H  | -4.13970 | 1.02200  | -2.85910 |
| H  | -4.21310 | 2.78000  | -3.02920 |
| C  | -1.60950 | 3.64710  | 1.80700  |
| H  | -1.61630 | 3.16270  | 2.78380  |
| H  | -0.57340 | 3.70880  | 1.47250  |
| H  | -1.98770 | 4.66780  | 1.93110  |
| C  | -5.41310 | 0.81800  | -0.26830 |
| H  | -5.58160 | 0.17390  | 0.59550  |
| H  | -6.28410 | 1.47400  | -0.37150 |
| H  | -5.36830 | 0.18130  | -1.15280 |
| C  | -4.20520 | 1.90540  | 2.49040  |
| H  | -3.43140 | 1.87550  | 3.25810  |
| H  | -4.89410 | 2.72210  | 2.73480  |
| H  | -4.76320 | 0.97020  | 2.54820  |
| C  | 2.01510  | -3.22520 | -0.06620 |
| C  | 1.90880  | -2.41980 | -1.19570 |
| C  | 1.22510  | -1.21600 | -1.10870 |
| C  | 0.63290  | -0.78840 | 0.07990  |
| C  | 0.76040  | -1.61040 | 1.19700  |
| C  | 1.43990  | -2.82160 | 1.13270  |
| F  | 2.67080  | -4.38630 | -0.13480 |
| F  | 2.45520  | -2.81690 | -2.35070 |
| F  | 1.10290  | -0.46500 | -2.21200 |
| F  | 0.22720  | -1.24830 | 2.37040  |
| F  | 1.55070  | -3.59860 | 2.21580  |

Cp(PH<sub>3</sub>)Ir=CF<sub>2</sub>

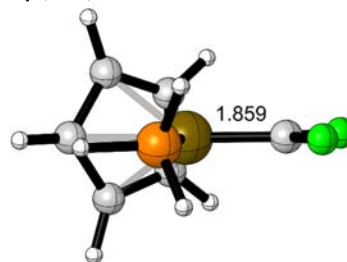

18  
IrCp\_PH3\_CF2\_D3

|    |          |          |          |
|----|----------|----------|----------|
| H  | -0.01090 | 0.84840  | -2.60290 |
| C  | 0.04930  | 1.12470  | -1.56290 |
| H  | 2.25210  | 1.24060  | -1.18480 |
| H  | -2.09430 | 1.26260  | -0.94340 |
| C  | 1.24370  | 1.32720  | -0.81100 |
| C  | -1.05080 | 1.34480  | -0.67800 |
| Ir | 0.18220  | -0.44090 | 0.17700  |
| F  | 1.32850  | -2.91760 | 1.20700  |
| C  | 1.45170  | -1.61170 | 0.86600  |
| C  | 0.87410  | 1.71050  | 0.52350  |
| F  | 2.73720  | -1.31900 | 1.14010  |
| C  | -0.54940 | 1.74550  | 0.59850  |
| H  | 1.55870  | 1.95990  | 1.31930  |
| H  | -1.13650 | 2.01520  | 1.46130  |
| P  | -1.36410 | -2.07590 | 0.21530  |
| H  | -1.73450 | -2.69130 | 1.43630  |
| H  | -1.18240 | -3.26010 | -0.54070 |
| H  | -2.65430 | -1.72680 | -0.24540 |

Cp(PH<sub>3</sub>)Ir=CF<sub>2</sub> + HCl: C---H Transition State

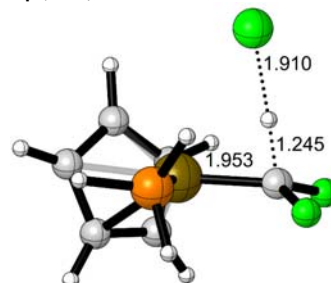

20  
IrCp\_PH3\_CF2\_HCl\_TS\_SEARCH\_1\_D3

|    |          |          |          |
|----|----------|----------|----------|
| H  | -0.89400 | 0.81260  | -2.04660 |
| C  | -0.67970 | 1.17830  | -1.05410 |
| H  | 1.57420  | 1.17770  | -1.00170 |
| H  | -2.71740 | 1.70710  | -0.24120 |
| C  | 0.63950  | 1.40460  | -0.51310 |
| C  | -1.64620 | 1.71010  | -0.11560 |
| Ir | -0.41480 | -0.12870 | 0.67720  |
| F  | 0.92170  | -2.69810 | 1.27990  |
| C  | 0.87940  | -1.35060 | 1.48070  |
| C  | 0.47170  | 1.93270  | 0.79590  |
| F  | 2.15820  | -0.96460 | 1.71780  |
| C  | -0.94760 | 2.13410  | 1.02170  |
| H  | 1.26060  | 2.18630  | 1.48720  |
| H  | -1.38520 | 2.49080  | 1.94160  |
| P  | -1.84150 | -1.91330 | 0.36390  |
| H  | -2.12040 | -2.63380 | 1.54180  |
| H  | -1.46900 | -2.93420 | -0.53540 |

|    |          |          |          |
|----|----------|----------|----------|
| H  | -3.12920 | -1.60410 | -0.11950 |
| H  | 0.16510  | -1.16330 | 2.48330  |
| Cl | -1.13500 | -1.25080 | 3.88040  |

Cp(PH<sub>3</sub>)Ir=CF<sub>2</sub> + HCl: Ir---H Transition State

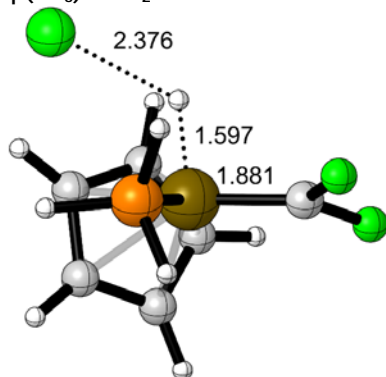

20  
IrCp\_PH3\_CF2\_HCl\_TS\_SEARCH\_4\_D3

|    |          |          |          |
|----|----------|----------|----------|
| H  | -0.84220 | 0.61720  | -2.22730 |
| C  | -0.30370 | 0.96910  | -1.36020 |
| H  | 1.82900  | 0.86390  | -2.02790 |
| H  | -1.94680 | 1.37490  | 0.12640  |
| C  | 1.10920  | 1.10330  | -1.26080 |
| C  | -0.89750 | 1.39280  | -0.12850 |
| Ir | 0.36530  | -0.45970 | 0.38190  |
| F  | 1.66420  | -2.80720 | 1.49020  |
| C  | 1.74020  | -1.56280 | 1.03860  |
| C  | 1.40390  | 1.57440  | 0.05750  |
| F  | 3.01710  | -1.21830 | 1.15390  |
| C  | 0.16220  | 1.77950  | 0.74510  |
| H  | 2.38750  | 1.78580  | 0.44830  |
| H  | 0.04500  | 2.15350  | 1.74990  |
| P  | -0.99410 | -2.26680 | -0.10080 |
| H  | -1.37450 | -3.07950 | 0.97060  |
| H  | -0.39200 | -3.20020 | -0.98560 |
| H  | -2.18620 | -1.96560 | -0.76680 |
| H  | -0.50740 | -0.68250 | 1.70090  |
| Cl | -2.87810 | -0.80130 | 1.80590  |

Cp(PH<sub>3</sub>)Ir(Cl)CHF<sub>2</sub>

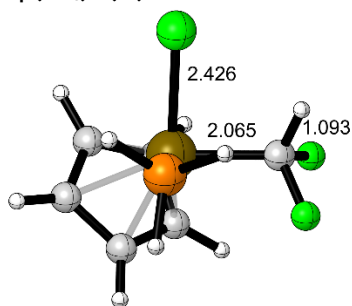

20  
IrCp\_PH3\_Cl\_CHF2\_D3

|   |          |         |          |
|---|----------|---------|----------|
| H | -1.70410 | 1.45380 | -1.05560 |
| C | -0.67800 | 1.21210 | -0.82340 |
| H | 0.00500  | 0.16060 | -2.65560 |
| H | -0.44880 | 2.02550 | 1.26770  |
| C | 0.20960  | 0.51060 | -1.65610 |
| C | -0.03020 | 1.47660 | 0.43980  |

|    |          |          |          |
|----|----------|----------|----------|
| Ir | -0.12070 | -0.76010 | 0.29860  |
| F  | 1.57790  | -2.13280 | 2.22540  |
| C  | 0.39090  | -1.38420 | 2.19940  |
| C  | 1.43280  | 0.29120  | -0.90510 |
| F  | 0.64570  | -0.30410 | 3.03500  |
| C  | 1.29650  | 0.94330  | 0.35880  |
| H  | 2.32920  | -0.18370 | -1.27350 |
| H  | 2.04430  | 0.98380  | 1.13590  |
| P  | 0.05690  | -2.94350 | -0.35790 |
| H  | -0.08860 | -3.92590 | 0.64220  |
| H  | 1.26240  | -3.37340 | -0.95390 |
| H  | -0.87480 | -3.41870 | -1.30540 |
| Cl | -2.40810 | -1.30980 | 0.89120  |
| H  | -0.36870 | -1.99010 | 2.69970  |

Cp(PH<sub>3</sub>)Ir(H)CCIF<sub>2</sub>

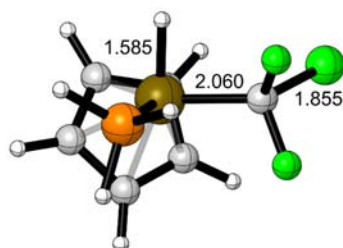

20  
IrCp\_PH3\_H\_CF2Cl

|    |          |          |          |
|----|----------|----------|----------|
| H  | -1.82990 | 1.28550  | -1.15250 |
| C  | -0.80110 | 1.17080  | -0.84980 |
| H  | 0.13360  | 0.19270  | -2.61990 |
| H  | -0.76720 | 2.05930  | 1.21900  |
| C  | 0.23460  | 0.58530  | -1.61970 |
| C  | -0.24710 | 1.56220  | 0.41650  |
| Ir | -0.08920 | -0.68460 | 0.31330  |
| F  | -0.25540 | -2.42000 | 2.68120  |
| C  | 0.39620  | -1.30330 | 2.21770  |
| C  | 1.45980  | 0.65430  | -0.85810 |
| F  | 1.73450  | -1.62510 | 2.34670  |
| C  | 1.15810  | 1.25620  | 0.38400  |
| H  | 2.43070  | 0.31250  | -1.18050 |
| H  | 1.85240  | 1.42640  | 1.19250  |
| P  | 0.17300  | -2.81420 | -0.40100 |
| H  | 0.15320  | -3.84300 | 0.56330  |
| H  | 1.36350  | -3.15270 | -1.08690 |
| H  | -0.75720 | -3.34340 | -1.32570 |
| H  | -1.53640 | -1.15340 | 0.75760  |
| Cl | 0.11000  | -0.02360 | 3.52920  |

Cp(PH<sub>3</sub>)Ir=CFCF<sub>3</sub>

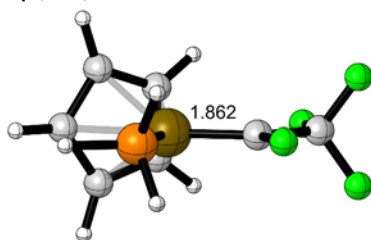

21  
IrCp\_PH3\_CFCF3\_D3

|   |          |         |          |
|---|----------|---------|----------|
| H | -0.37500 | 3.09320 | -1.59230 |
| C | -0.54390 | 2.50610 | -0.70430 |



|    |          |          |          |
|----|----------|----------|----------|
| H  | 1.32370  | 2.83780  | 0.49610  |
| H  | -2.56730 | 1.62740  | -1.04790 |
| C  | 0.35530  | 2.37260  | 0.40240  |
| C  | -1.70870 | 1.74210  | -0.40360 |
| Ir | 0.13620  | 0.29180  | -0.47740 |
| F  | 2.10530  | -1.77500 | -1.00920 |
| C  | 1.72610  | -0.65820 | -0.28390 |
| C  | -0.26560 | 1.53260  | 1.37990  |
| C  | -1.55090 | 1.14490  | 0.88050  |
| H  | 0.15600  | 1.25880  | 2.33390  |
| H  | -2.27190 | 0.52890  | 1.39300  |
| P  | -0.49310 | -1.13720 | -2.11130 |
| H  | -0.63470 | -2.51550 | -1.82930 |
| H  | 0.28140  | -1.25040 | -3.28910 |
| H  | -1.75650 | -0.89610 | -2.69600 |
| C  | 2.88850  | -0.41320 | 0.66810  |
| F  | 4.04470  | -0.18660 | -0.00050 |
| F  | 2.67970  | 0.65590  | 1.46670  |
| F  | 3.10470  | -1.47610 | 1.47960  |

Cp(PH<sub>3</sub>)Ir=CFCF<sub>3</sub> + HCl: C---H Transition State

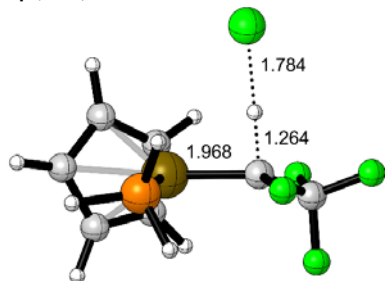

23  
IrCp\_PH3\_CF3CF3\_HCl\_TS\_SEARCH\_CH\_D3

|    |          |          |          |
|----|----------|----------|----------|
| H  | -0.87150 | 2.14460  | -1.01490 |
| C  | -1.21070 | 1.60460  | -0.14460 |
| H  | 0.59200  | 1.65990  | 1.21410  |
| H  | -3.36360 | 1.15800  | -0.61480 |
| C  | -0.43820 | 1.37900  | 1.05950  |
| C  | -2.54730 | 1.12480  | 0.08990  |
| Ir | -0.95370 | -0.56560 | 0.13230  |
| F  | 0.85040  | -2.84090 | -0.37420 |
| C  | 0.44350  | -1.88310 | 0.56090  |
| C  | -1.26440 | 0.66980  | 1.96780  |
| C  | -2.57150 | 0.51310  | 1.35850  |
| H  | -0.97900 | 0.28630  | 2.93480  |
| H  | -3.39500 | -0.02510 | 1.80150  |
| P  | -1.32460 | -1.64700 | -1.85900 |
| H  | -1.80890 | -2.96920 | -1.78770 |
| H  | -0.23530 | -1.82490 | -2.73470 |
| H  | -2.26950 | -1.06360 | -2.72840 |
| C  | 1.66190  | -1.58290 | 1.41730  |
| F  | 2.61160  | -0.91770 | 0.70740  |
| F  | 1.33350  | -0.79410 | 2.46700  |
| F  | 2.24160  | -2.69010 | 1.90480  |
| H  | -0.42690 | -2.41420 | 1.30850  |
| Cl | -1.64760 | -3.05290 | 2.44230  |

Cp(PH<sub>3</sub>)Ir=CFCF<sub>3</sub> + HCl: Ir---H Transition State

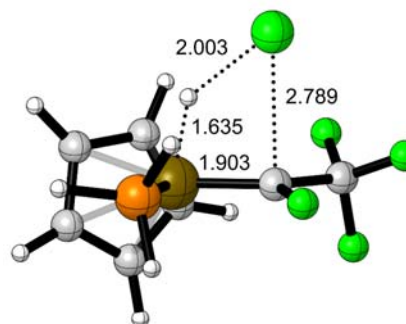

23  
IrCp\_PH3\_CF3CF3\_HCl\_TS\_SEARCH\_CCl\_D3

|    |          |          |          |
|----|----------|----------|----------|
| H  | -0.30030 | 2.28470  | -0.65140 |
| C  | -0.87200 | 1.75150  | 0.09150  |
| H  | 0.59160  | 1.48310  | 1.77180  |
| H  | -2.85460 | 1.47950  | -0.88660 |
| C  | -0.39370 | 1.30980  | 1.36900  |
| C  | -2.21850 | 1.32190  | -0.02850 |
| Ir | -0.88710 | -0.63880 | 0.26710  |
| F  | 1.17080  | -2.51220 | -0.52540 |
| C  | 0.75240  | -1.60150 | 0.35630  |
| C  | -1.47120 | 0.66530  | 2.05510  |
| C  | -2.60110 | 0.66050  | 1.17990  |
| H  | -1.43000 | 0.25050  | 3.04980  |
| H  | -3.57590 | 0.25770  | 1.40410  |
| P  | -1.59080 | -2.02400 | -1.40020 |
| H  | -1.49260 | -3.39980 | -1.11730 |
| H  | -0.98150 | -1.96300 | -2.67360 |
| H  | -2.94530 | -1.90510 | -1.77560 |
| C  | 1.92910  | -1.29610 | 1.30790  |
| F  | 2.66100  | -0.29750 | 0.72700  |
| F  | 1.51000  | -0.83460 | 2.49130  |
| F  | 2.74610  | -2.32600 | 1.50190  |
| H  | -1.25300 | -1.96160 | 1.15620  |
| Cl | -0.39400 | -3.59520 | 1.93470  |

Cp(PH<sub>3</sub>)Ir(Cl)CHFCF<sub>3</sub>

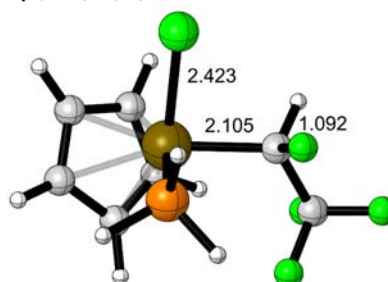

23  
IrCp\_PH3\_Cl\_CFHCF3

|    |          |          |          |
|----|----------|----------|----------|
| H  | -1.78100 | 1.82590  | -1.30960 |
| C  | -1.59670 | 1.51340  | -0.29320 |
| H  | 0.61730  | 1.89830  | -0.01680 |
| H  | -3.59120 | 0.79900  | 0.37230  |
| C  | -0.30990 | 1.51200  | 0.37600  |
| C  | -2.55410 | 0.99350  | 0.59680  |
| Ir | -0.96100 | -0.62670 | 0.26690  |
| F  | 0.50170  | -3.18990 | 0.22550  |
| C  | 0.30650  | -2.08710 | 1.09820  |
| C  | -0.52620 | 1.04950  | 1.71210  |

|    |          |          |          |
|----|----------|----------|----------|
| C  | -1.89560 | 0.68410  | 1.84750  |
| H  | 0.23080  | 0.95810  | 2.47240  |
| H  | -2.37080 | 0.28980  | 2.73160  |
| P  | -0.22560 | -1.37270 | -1.77030 |
| H  | -0.84260 | -2.53680 | -2.26810 |
| H  | 1.13860  | -1.68090 | -1.93120 |
| H  | -0.40940 | -0.48600 | -2.85430 |
| C  | 1.72190  | -1.65310 | 1.45880  |
| F  | 2.37890  | -1.06680 | 0.42720  |
| F  | 1.70950  | -0.75930 | 2.48300  |
| F  | 2.48820  | -2.68720 | 1.86450  |
| H  | -0.14830 | -2.49650 | 2.00250  |
| Cl | -2.62020 | -2.39170 | 0.29290  |

**Cp(PH<sub>3</sub>)Ir(H)CClCF<sub>3</sub>**

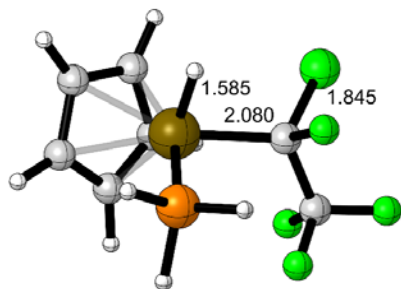

23

**IrCp\_PH3\_H\_CFClCF3**

|    |          |          |          |
|----|----------|----------|----------|
| H  | -1.81170 | 1.85270  | -1.24290 |
| C  | -1.67220 | 1.48640  | -0.23700 |
| H  | 0.45180  | 2.07820  | 0.23350  |
| H  | -3.67400 | 0.62680  | 0.25290  |
| C  | -0.46900 | 1.61110  | 0.54400  |
| C  | -2.66010 | 0.83970  | 0.55190  |
| Ir | -0.96410 | -0.67340 | 0.25100  |
| F  | 0.28780  | -3.31300 | 0.64950  |
| C  | 0.28380  | -2.03560 | 1.20780  |
| C  | -0.72020 | 1.01040  | 1.80290  |
| C  | -2.06640 | 0.51680  | 1.82100  |
| H  | -0.00770 | 0.90770  | 2.60590  |
| H  | -2.55520 | 0.04340  | 2.65690  |
| P  | -0.22400 | -1.38760 | -1.76430 |
| H  | -1.16490 | -1.47150 | -2.81680 |
| H  | 0.33640  | -2.67750 | -1.84210 |
| H  | 0.77580  | -0.64280 | -2.43130 |
| C  | 1.78860  | -1.65250 | 1.23410  |
| F  | 2.26090  | -1.55450 | -0.03770 |
| F  | 1.99240  | -0.45850 | 1.82470  |
| F  | 2.56520  | -2.55280 | 1.85740  |
| Cl | -0.18550 | -2.28470 | 2.97460  |
| H  | -1.89300 | -1.95610 | 0.18130  |

**Cp(PH<sub>3</sub>)Ir=C(CF<sub>3</sub>)<sub>2</sub>**

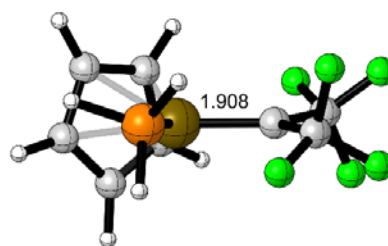

24

**IrCp\_PH3\_bisCF3\_D3**

|    |          |          |          |
|----|----------|----------|----------|
| H  | 0.24610  | 1.78210  | -3.28240 |
| C  | -0.08330 | 1.94470  | -2.26870 |
| H  | 1.81720  | 2.47880  | -1.18490 |
| H  | -2.28620 | 1.61640  | -2.39480 |
| C  | 0.75220  | 2.31640  | -1.15480 |
| C  | -1.42500 | 1.87670  | -1.79850 |
| Ir | -0.11850 | 0.29310  | -0.71090 |
| C  | 1.30120  | -0.75160 | 0.01860  |
| C  | -0.08490 | 2.45580  | -0.00860 |
| C  | -1.43200 | 2.17120  | -0.40180 |
| H  | 0.24550  | 2.71450  | 0.98450  |
| H  | -2.29710 | 2.20070  | 0.24110  |
| P  | -1.58650 | -1.42960 | -0.96800 |
| H  | -1.74320 | -2.42200 | 0.02070  |
| H  | -1.54170 | -2.25510 | -2.11270 |
| H  | -2.92640 | -0.98910 | -1.06480 |
| C  | 2.56060  | -0.11220 | 0.58260  |
| F  | 3.01100  | -0.72760 | 1.70580  |
| F  | 3.58770  | -0.12710 | -0.31090 |
| F  | 2.39630  | 1.19200  | 0.92810  |
| C  | 1.38750  | -2.25920 | 0.14530  |
| F  | 2.64320  | -2.74610 | 0.02490  |
| F  | 0.90710  | -2.70590 | 1.33980  |
| F  | 0.65770  | -2.91640 | -0.80480 |

**Cp(PH<sub>3</sub>)Ir=C(CF<sub>3</sub>)<sub>2</sub> + HCl: C---H Transition State**

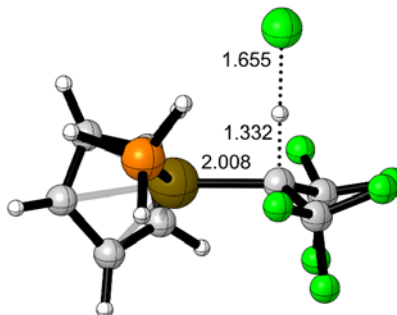

26

**IrCp\_PH3\_bis\_CF3\_HCl\_TS\_SEARCH\_3\_D3\_RES**

TART

|    |          |          |          |
|----|----------|----------|----------|
| H  | 0.34280  | 1.19740  | -2.48230 |
| C  | -0.15530 | 1.51490  | -1.57940 |
| H  | 1.55380  | 2.05650  | -0.21130 |
| H  | -2.32600 | 1.36730  | -2.12450 |
| C  | 0.49130  | 1.99430  | -0.37970 |
| C  | -1.57570 | 1.63540  | -1.39690 |
| Ir | -0.64640 | 0.12150  | 0.03770  |
| C  | 0.57380  | -0.97780 | 1.19350  |
| C  | -0.53050 | 2.30420  | 0.55400  |
| C  | -1.81210 | 2.08300  | -0.07540 |

|    |          |          |          |
|----|----------|----------|----------|
| H  | -0.37900 | 2.62100  | 1.57400  |
| H  | -2.77190 | 2.23230  | 0.39330  |
| P  | -2.19590 | -1.56740 | -0.28970 |
| H  | -2.56910 | -2.30160 | 0.84930  |
| H  | -1.96740 | -2.57320 | -1.24790 |
| H  | -3.43990 | -1.07130 | -0.73530 |
| C  | 1.77970  | -0.23290 | 1.74930  |
| F  | 2.46850  | -0.89610 | 2.69380  |
| F  | 2.68640  | 0.09360  | 0.77710  |
| F  | 1.40200  | 0.94780  | 2.31070  |
| C  | 0.90040  | -2.43900 | 0.95060  |
| F  | 1.88190  | -2.58270 | 0.02070  |
| F  | 1.30320  | -3.10780 | 2.04370  |
| F  | -0.17320 | -3.13710 | 0.47130  |
| H  | -0.32260 | -1.02060 | 2.17810  |
| Cl | -1.46140 | -1.20750 | 3.36440  |

Cp(PH<sub>3</sub>)Ir=C(CF<sub>3</sub>)<sub>2</sub> + HCl: Ir---H TransitionState

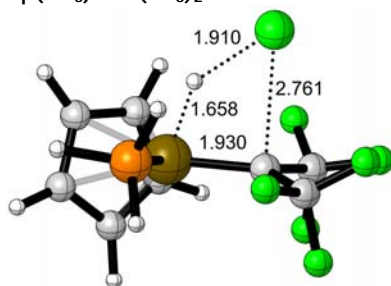

26  
IrCp\_PH3\_bis\_CF3\_HCl\_TS\_SEARCH\_Ir\_H\_D3

|    |          |          |          |
|----|----------|----------|----------|
| H  | 0.03880  | 1.39280  | -2.12140 |
| C  | -0.54210 | 1.62300  | -1.24200 |
| H  | 1.01760  | 2.19020  | 0.26500  |
| H  | -2.63320 | 1.23610  | -1.90090 |
| C  | -0.02110 | 2.02390  | 0.03240  |
| C  | -1.95120 | 1.53420  | -1.11880 |
| Ir | -1.02830 | -0.00780 | 0.43170  |
| C  | 0.37280  | -1.02280 | 1.28700  |
| C  | -1.12140 | 2.23930  | 0.91820  |
| C  | -2.31990 | 1.91690  | 0.21120  |
| H  | -1.05190 | 2.56830  | 1.94280  |
| H  | -3.32420 | 1.98940  | 0.59740  |
| P  | -2.44760 | -1.74350 | 0.00540  |
| H  | -2.89510 | -2.50320 | 1.10000  |
| H  | -2.13050 | -2.75080 | -0.92770 |
| H  | -3.67630 | -1.29940 | -0.53200 |
| C  | 1.60720  | -0.25440 | 1.80940  |
| F  | 2.41090  | -0.93790 | 2.63110  |
| F  | 2.37080  | 0.11110  | 0.73560  |
| F  | 1.26460  | 0.88170  | 2.44330  |
| C  | 0.62260  | -2.53560 | 1.27440  |
| F  | 1.54870  | -2.75190 | 0.29430  |
| F  | 1.09470  | -3.08800 | 2.38810  |
| F  | -0.47360 | -3.25030 | 0.92520  |
| H  | -1.55330 | -0.30270 | 1.97680  |
| Cl | -1.09920 | -1.16810 | 3.61830  |

Cp(PH<sub>3</sub>)Ir(Cl)[CH(CF<sub>3</sub>)<sub>2</sub>]

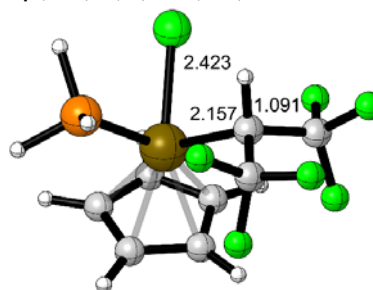

26  
IrCp\_PH3\_Cl\_CH\_bisCF3

|    |          |          |          |
|----|----------|----------|----------|
| H  | -0.50910 | 0.21590  | -2.35660 |
| C  | -0.63500 | 0.82830  | -1.47730 |
| H  | 1.42640  | 0.87900  | -0.61780 |
| H  | -2.81550 | 1.42800  | -1.54250 |
| C  | 0.40040  | 1.20310  | -0.57170 |
| C  | -1.85490 | 1.48740  | -1.05540 |
| Ir | -1.12310 | 0.01790  | 0.54080  |
| C  | 0.32540  | -1.11860 | 1.66410  |
| C  | -0.16970 | 2.04990  | 0.43750  |
| C  | -1.55930 | 2.21920  | 0.11880  |
| H  | 0.35230  | 2.49450  | 1.26800  |
| H  | -2.27460 | 2.75890  | 0.72040  |
| P  | -2.38640 | -1.80510 | -0.05430 |
| H  | -1.84290 | -3.09350 | -0.21700 |
| H  | -3.04360 | -1.67450 | -1.29790 |
| H  | -3.48160 | -2.08190 | 0.78990  |
| C  | 1.26260  | -0.22690 | 2.47790  |
| F  | 1.95050  | -0.91860 | 3.41790  |
| F  | 2.19770  | 0.39020  | 1.69460  |
| F  | 0.61520  | 0.75060  | 3.13980  |
| C  | 1.13010  | -2.10030 | 0.82190  |
| F  | 1.60460  | -1.56540 | -0.33320 |
| F  | 2.20320  | -2.63180 | 1.45110  |
| F  | 0.35630  | -3.16180 | 0.45900  |
| H  | -0.20560 | -1.71620 | 2.40700  |
| Cl | -2.42410 | 0.04310  | 2.58430  |

Cp(PH<sub>3</sub>)Ir(H)[CCl(CF<sub>3</sub>)<sub>2</sub>]

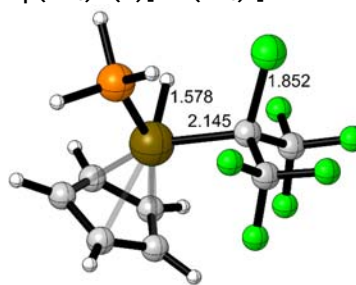

26  
IrCp\_PH3\_H\_CClbisCF3

|    |          |          |          |
|----|----------|----------|----------|
| H  | -0.34880 | 0.26580  | -2.46130 |
| C  | -0.52660 | 0.87490  | -1.58950 |
| H  | 1.48860  | 1.04870  | -0.67340 |
| H  | -2.74360 | 1.26750  | -1.66410 |
| C  | 0.44190  | 1.30140  | -0.65690 |
| C  | -1.80030 | 1.39780  | -1.15560 |
| Ir | -1.09810 | 0.04040  | 0.54600  |
| C  | 0.28340  | -1.17350 | 1.64940  |
| C  | -0.20010 | 2.10100  | 0.35270  |

|   |          |          |          |    |          |          |          |
|---|----------|----------|----------|----|----------|----------|----------|
| C | -1.59070 | 2.18360  | 0.01190  | F  | 1.92540  | 0.56310  | 1.83930  |
| H | 0.29260  | 2.60460  | 1.16770  | F  | 0.43890  | 0.43700  | 3.42060  |
| H | -2.34660 | 2.73300  | 0.55040  | C  | 1.17490  | -2.04460 | 0.72820  |
| P | -2.49340 | -1.71600 | 0.18260  | F  | 1.88130  | -1.28060 | -0.13840 |
| H | -2.02220 | -3.04280 | 0.23150  | F  | 2.07390  | -2.80980 | 1.37750  |
| H | -3.11630 | -1.73020 | -1.08700 | F  | 0.42880  | -2.88850 | -0.02280 |
| H | -3.64270 | -1.84870 | 0.99180  | Cl | -0.52000 | -2.38040 | 2.80100  |
| C | 1.17470  | -0.30220 | 2.57110  | H  | -1.77740 | 0.12000  | 1.96850  |
| F | 2.04540  | -1.00500 | 3.32440  |    |          |          |          |

## References.

- (a) Becke, A. D., Density-functional thermochemistry. III. The role of exact exchange. *J. Chem. Phys.* **1993**, *98* (7), 5648-52; (b) Becke, A. D., A new mixing of Hartree-Fock and local-density-functional theories. *J. Chem. Phys.* **1993**, *98* (2), 1372-7; (c) Lee, C.; Yang, W.; Parr, R. G., Development of the Colle-Salvetti correlation-energy formula into a functional of the electron density. *Phys. Rev. B* **1988**, *37* (2), 785-9; (d) Stephens, P. J.; Devlin, F. J.; Chabalowski, C. F.; Frisch, M. J., Ab Initio Calculation of Vibrational Absorption and Circular Dichroism Spectra Using Density Functional Force Fields. *J. Phys. Chem.* **1994**, *98* (45), 11623-7.
- (a) Grimme, S.; Antony, J.; Ehrlich, S.; Krieg, H., A consistent and accurate ab initio parametrization of density functional dispersion correction (DFT-D) for the 94 elements H-Pu. *J. Chem. Phys.* **2010**, *132* (15), 154104; (b) Goerigk, L.; Grimme, S., A thorough benchmark of density functional methods for general main group thermochemistry, kinetics, and noncovalent interactions. *Phys. Chem. Chem. Phys.* **2011**, *13* (14), 6670-6688.
- (a) Frisch, M. J.; Pople, J. A.; Binkley, J. S., Self-consistent molecular orbital methods. 25. Supplementary functions for Gaussian basis sets. *J. Chem. Phys.* **1984**, *80* (7), 3265-9; (b) Clark, T.; Chandrasekhar, J.; Spitznagel, G. W.; Schleyer, P. v. R., Efficient diffuse function-augmented basis sets for anion calculations. III. The 3-21 + G basis set for first-row elements, lithium to fluorine. *J. Comput. Chem.* **1983**, *4*, 294-301; (c) McLean, A. D.; Chandler, G. S., Contracted Gaussian basis sets for molecular calculations. I. Second row atoms, Z = 11-18. *J. Chem. Phys.* **1980**, *72*, 5639-48; (d) Krishnan, R.; Binkley, J. S.; Seeger, R.; Pople, J. A., Self-consistent molecular orbital methods. XX. A basis set for correlated wave functions. *J. Chem. Phys.* **1980**, *72* (1), 650-4.
- Jaguar, versions 7.0-7.9*, Schrödinger, LLC, New York, NY: 2007-2012.
